# Supplementary material for: Testosterone Increases the Emission of Ultrasonic Vocalizations With Different Acoustic Characteristics in Mice
Source: Preprints.org preprint supplement (doi:10.20944/preprints202103.0146.v1), 2021-03-04
Supplement: Supplementary file 2 [file supplementary]

Supplementary materials.

Supplementary table S1.

Supplementary table S2

Supplementary Figure S1

Figure S1. Acoustic characteristics of the 9 call types. The acoustic parameters were grouped in 3, according to the clustering result (Figure 1), and each call types (1 to 9) were plotted in the radar charts.
